# Supplementary material for: A coral129I/127I measurement method using ICP-MS and AMS with carrier addition
Source: Royal Society of Chemistry journal article supplement (doi:10.1039/c7ay01458a), 2017-01-01
Supplement: c7ay01458a1.pdf [file c7ay01458a1.pdf]

| Sample Name | I-127 (ppb) | Amount of Istd added |             |       |
|-------------|-------------|----------------------|-------------|-------|
| Ba          | 0.956       | 0.000                | Slope       | 0.777 |
|             | 1.375       | 0.490                | Intercept   | 0.965 |
|             | 1.722       | 1.005                | Correlation | 0.999 |
|             | 2.530       | 2.009                | Unknown     | 1.243 |
| Bb          | 1.215       | 0.000                | Slope       | 0.901 |
|             | 1.607       | 0.508                | Intercept   | 1.129 |
|             | 1.831       | 0.999                | Correlation | 0.971 |
|             | 3.054       | 2.034                | Unknown     | 1.254 |
| S           | 0.883       | 0.000                | Slope       | 0.982 |
|             | 1.548       | 0.503                | Intercept   | 0.931 |
|             | 1.831       | 1.006                | Correlation | 0.988 |
|             | 2.921       | 2.012                | Unknown     | 0.948 |

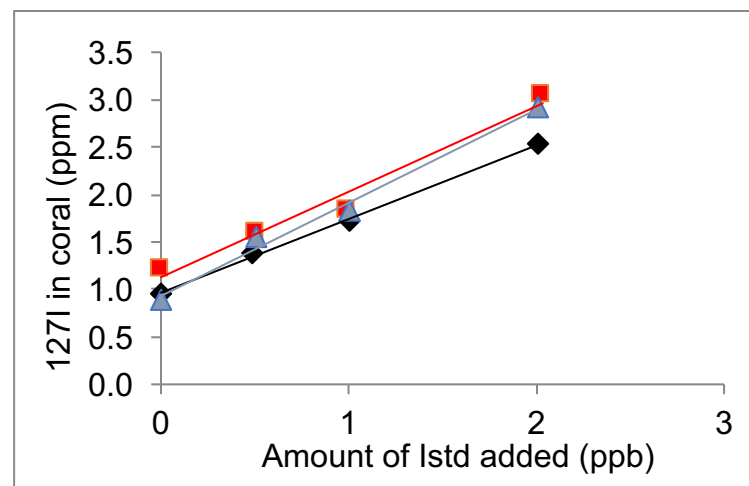

| Sample | Sample weight             |                         | 127I ppb                            |                            | Dissolved        |                           | 127I in coral (ppm) |
|--------|---------------------------|-------------------------|-------------------------------------|----------------------------|------------------|---------------------------|---------------------|
|        | added in ICP solution (g) | ICP solution weight (g) | (determined from standard addition) | 127I in ICP solution (ppb) | coral weight (g) | coral solution weight (g) |                     |
| Ba     | 0.0165                    | 5.0101                  | 1.243                               | 377.518                    | 5.584            | 71.484                    | <b>4.832</b>        |
| Bb     | 0.0182                    | 4.9926                  | 1.254                               | 343.947                    | 4.665            | 59.604                    | <b>4.395</b>        |
| S      | 0.0166                    | 5.017                   | 0.948                               | 286.457                    | 3.307            | 41.986                    | <b>3.637</b>        |
